# Supplementary material
Source: Springer Nature journal article supplement (https://www.springermedizin.de/resource/supplementary/12916_2013_888_MOESM26_ESM.pdf/9598866)
Supplement: MOESM26 [file 9598866]

| Neonatal Causes         | Tariff |        | SSP    |        | RF     |        | PCVA   |        | InterVA |        |
|-------------------------|--------|--------|--------|--------|--------|--------|--------|--------|---------|--------|
|                         | No HCE | HCE    | No HCE  | HCE    |
|                         | Median  | Median |
| Birth asphyxia          | 91.6   | 92     | 91     | 90.9   | 90.6   | 91.5   | 68.7   | 73.5   | 67.4    | 67.5   |
| Congenital malformation | 94.3   | 94.2   | 96.6   | 96.8   | 95.3   | 95.2   | 98.4   | 97     | 100     | 99.5   |
| Meningitis/Sepsis       | 93.8   | 93.4   | 89     | 88.1   | 96     | 95.7   | 93.1   | 93.3   | 94.5    | 94.1   |
| Pneumonia               | 93.9   | 94.8   | 94     | 93.3   | 98.8   | 98.5   | 94.1   | 95.2   | 83.3    | 83.8   |
| Preterm Delivery        | 92.5   | 93.3   | 85.5   | 88.6   | 91.8   | 92     | 85.3   | 86.6   | 95.2    | 95     |
| Stillbirth              | 94.9   | 94.9   | 95     | 94.9   | 94.1   | 94.2   | 95.3   | 94.6   | 95.3    | 95.3   |
